# Supplementary material for: A Heterotypic Tridimensional Model to Study the Interaction of Macrophages and Glioblastoma In Vitro
Source: MDPI journal article supplement (doi:10.3390/ijms22105105), 2021-05-12
Supplement: s1 [file s1]

## Supplementary Figures

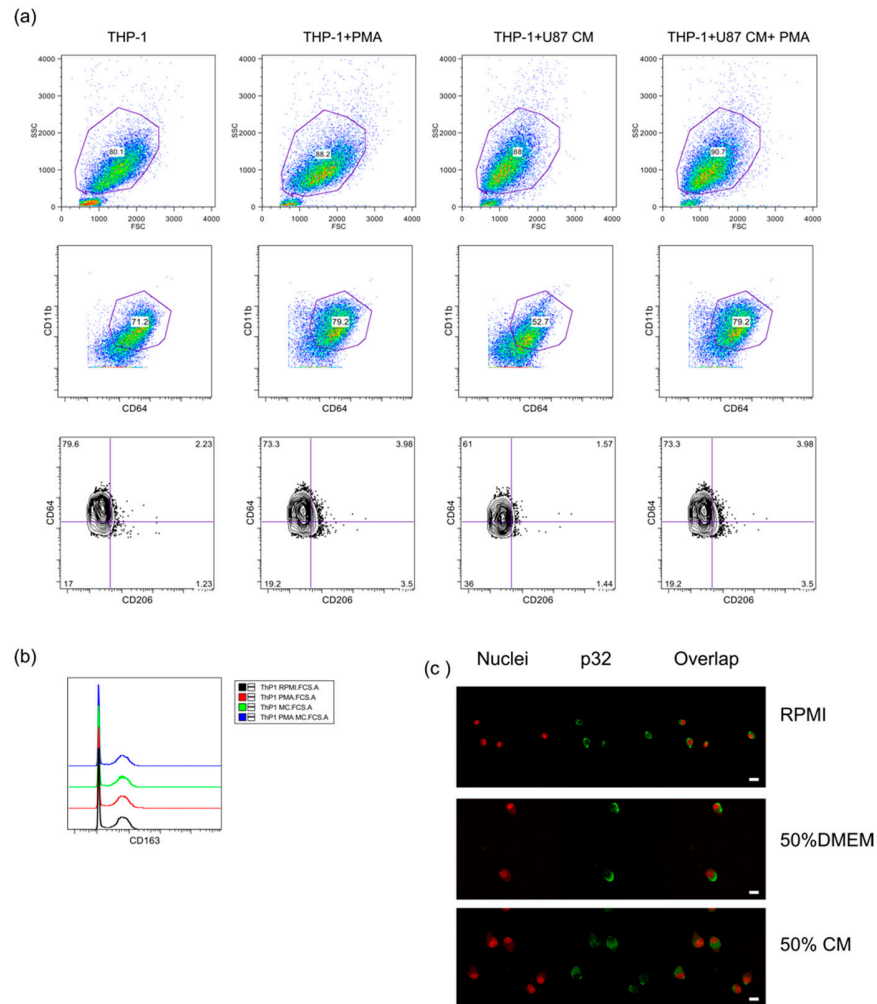

**Supplementary Figure S1:** U87MG conditioned media doesn't enhance macrophage polarization in THP-1 cells. THP-1 cells were incubated for 7 days in complete RPMI, complete RPMI with PMA (10ng/ml), complete RPMI + 50% U87MG Conditioned Media (CM) and complete RPMI with PMA (10ng/ml) + 50% U87MG Conditioned Media (CM) to see macrophages differentiation and polarization. No significant differences are shown in the expression of CD64 in CD11b+ gated cells (Figure a, second panel) neither in the expression of CD206 (a, third panel) or in the expression of CD163 (b) (N=3). THP-1 cell line expresses p32/gC1qR in three different treatments. Cells were incubated with RPMI, RPMI + 50% complete DMEM low glucose (50%DMEM) and RPMI + 50% U87MG conditioned media (50%CM) for 5 days and were subsequently fixed and stained for p32 as explained in materials and methods. Representative images of stained cells; nuclei are counterstained in red (red dot) and p32 is shown in green (Alexa 488) (c) no significant difference are shown in the three treatments.

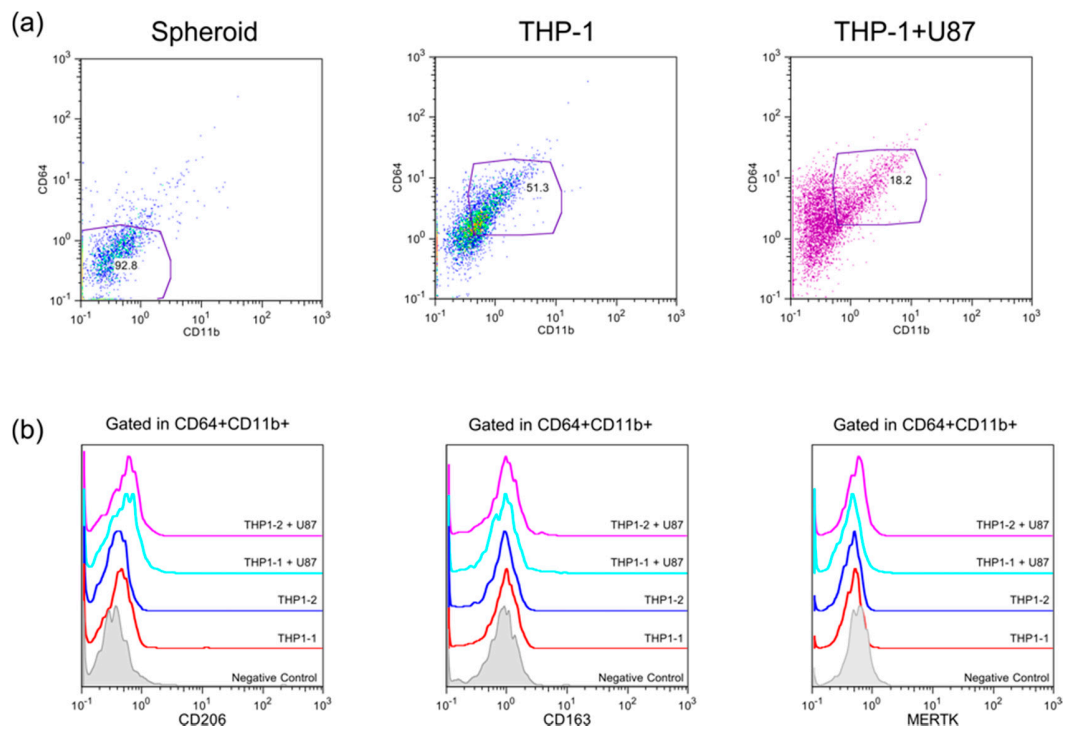

**Supplementary Figure S2:** THP-1 cells infiltrating U87MG spheroid are not skewed to a M2 phenotype. We used gated CD64<sup>+</sup>CD11b<sup>+</sup> THP-1 cells inside the spheroid or cultured in complete fresh RPMI (control) to analyze further macrophage differentiation (a). Representative histograms show no differences in the expression of CD206<sup>+</sup>, CD163<sup>+</sup> or MERTK<sup>+</sup> between this THP-1 in co-culture or the control (b).

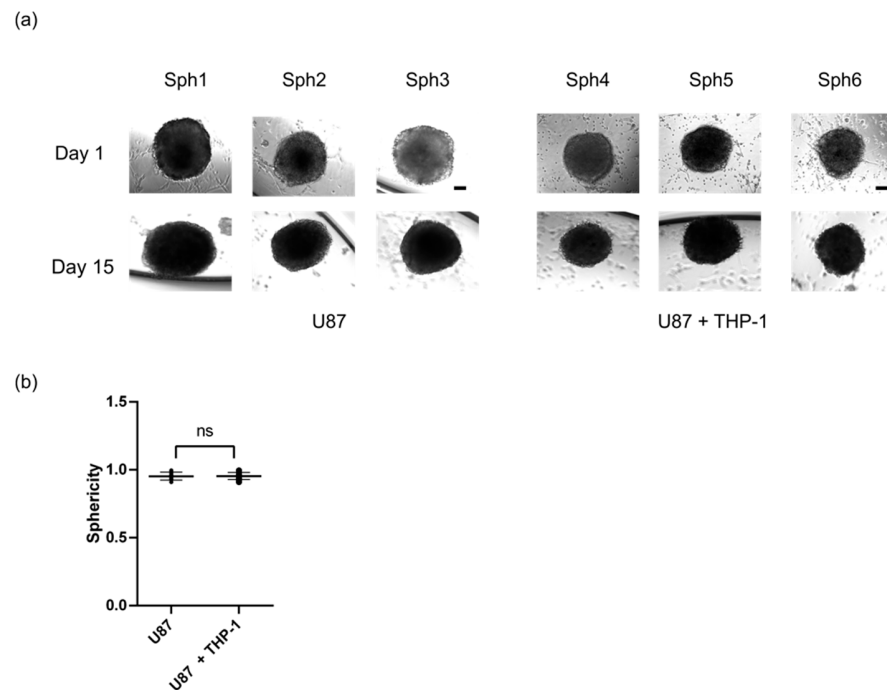

**Supplementary Figure S3:** Impact of THP-1 cells on the growth of U87MG spheroids. (a) Representative images of U87MG spheroids at days 1 and 15 after infiltration with THP-1 cells. (b) Independent data showing no differences in the sphericity of spheroids without (N=10) and with (N=10) THP-1 cells. A two-tailed unpaired t-test was performed \*\*:  $p \leq .01$ . Scale bar: 50  $\mu\text{m}$ .
